# Supplementary material for: Subcortical and Cerebellar Neural Correlates of Prodromal Alzheimer’s Disease with Prolonged Sleep Latency
Source: PubMed Central journal article supplement — J Alzheimers Dis. 2022 Mar 22;86(2):565–78. doi: 10.3233/JAD-215460 (PMC9028620; doi:10.3233/jad-215460), 2022-03-22
Supplement: jad-86-jad215460-s001.pdf [file jad-86-jad215460-s001.pdf]

# Supplementary Material

## Subcortical and Cerebellar Neural Correlates of Prodromal Alzheimer’s Disease with Prolonged Sleep Latency

**Supplementary Table 1.** Results of one-sample t-test on 60 subjects regarding the LC seed (x=4.6, y=-36.6, z=-21) selected for the study. (Voxel threshold:  $p < 0.001$ , uncorrected, Cluster threshold:  $p < 0.05$ , cluster-size p-FDR corrected)

| Seed-to voxel analysis | Clusters (x,y,z) | Regions covered by the cluster                          | Size             | Size p-FDR | Peak p-uncorrected |
|------------------------|------------------|---------------------------------------------------------|------------------|------------|--------------------|
| FC>0                   | +04, -36, -22    | 1) Brainstem                                            | 1738             | <0.00001   | <0.00001           |
|                        |                  | 2) Right cerebellum                                     |                  |            |                    |
|                        |                  | 3) Left cerebellum                                      |                  |            |                    |
|                        |                  | 4) Vermis of the cerebellum                             |                  |            |                    |
|                        |                  | 5) Right hippocampus                                    |                  |            |                    |
|                        |                  | 6) Left hippocampus                                     |                  |            |                    |
|                        |                  | 7) Right parahippocampal gyrus, posterior division      |                  |            |                    |
|                        |                  | 8) Left parahippocampal gyrus, posterior division       |                  |            |                    |
|                        |                  | 9) Right parahippocampal gyrus, anterior division       |                  |            |                    |
|                        |                  | 10) Left parahippocampal gyrus, anterior division       |                  |            |                    |
|                        |                  | 11) Right temporal occipital fusiform cortex            |                  |            |                    |
|                        |                  | 12) Temporal fusiform cortex, posterior division, right |                  |            |                    |
|                        |                  | 13) Right lingual gyrus                                 |                  |            |                    |
|                        | +00, -48, +08    | 1) Precuneus cortex                                     | 201              | 0.000218   | 0.000025           |
|                        |                  | 2) Cingulate gyrus, posterior division                  |                  |            |                    |
|                        |                  | 3) Vermis of the cerebellum                             |                  |            |                    |
|                        |                  | 4) Left intracalcarine cortex                           |                  |            |                    |
|                        | -10, -62, -16    | 1) Left cerebellum                                      | 72               | 0.026114   | 0.00006            |
| FC<0                   | +36, +50, +12    | 1) Right frontal pole                                   | 173              | 0.000439   | 0.000009           |
|                        |                  | +12, +08, +14                                           | 1) Right caudate | 112        | 0.004628           |
